# Supplementary material for: Investigation of Pb–B Bonding in PbB2(BO)n− (n = 0–2): Transformation from Aromatic PbB2− to Pb[B2(BO)2]−/0 Complexes with BB Triple Bonds
Source: Royal Society of Chemistry journal article supplement (doi:10.1039/d3cp02800c), 2024-01-01
Supplement: d3cp02800c1.pdf [file d3cp02800c1.pdf]

## Supplementary Information

### **Investigation of Pb–B Bonding in $\text{PbB}_2(\text{BO})_n^-$ ( $n = 0-2$ ): Transformation from an Aromatic $\text{PbB}_2^-$ to $\text{Pb}[\text{B}_2(\text{BO})_2]^{-/0}$ Complexes with a $\text{B}\equiv\text{B}$ Triple Bond**

Qiang Chen,<sup>a,c,†</sup> Wei-Jia Chen,<sup>b,†</sup> Xin-Yao Wu,<sup>a,†</sup> Teng-Teng Chen,<sup>b,c</sup> Rui-Nan Yuan,<sup>a</sup> Hai-Gang Lu,<sup>a,c</sup>  
Dao-Fu Yuan,<sup>\*b,d</sup> Si-Dian Li,<sup>\*a,c</sup> and Lai-Sheng Wang<sup>\*b</sup>

<sup>a</sup> *Institute of Molecular Science, Key Laboratory of Materials for Energy Conversion and Storage of Shanxi Province, Shanxi University, Taiyuan 030006, People's Republic of China. Email: chenqiang@sxu.edu.cn, lisidian@sxu.edu.cn*

<sup>b</sup> *Department of Chemistry, Brown University, Providence, Rhode Island 02912, USA. Email: ydfu@ustc.edu.cn, lai-sheng\_wang@brown.edu*

<sup>c</sup> *Key Laboratory of Chemical Biology and Molecular Engineering of Ministry of Education, Shanxi University, Taiyuan 030006, People's Republic of China*

<sup>d</sup> *Hefei National Research Center for Physical Sciences at the Microscale, University of Science and Technology of China, Hefei 230026, China*

<sup>e</sup> *Department of Chemistry, The Hong Kong University of Science and Technology (HKUST), Clear Water Bay, Hong Kong SAR, China*

† These authors contributed equally to this work.

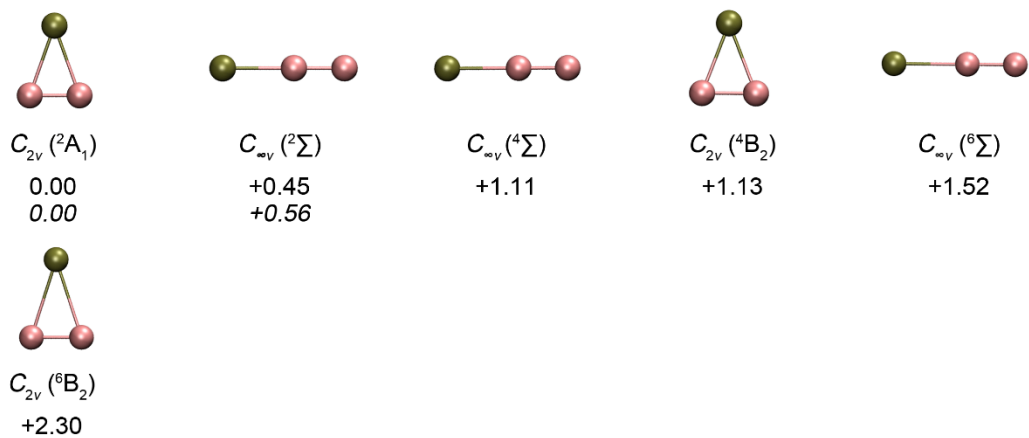

**Fig. S1.** Low-lying isomers of  $\text{PbB}_2^-$ , along with their relative energies indicated in eV at PBE0/AVTZ and CCSD(T)/AVTZ (in italic) levels, respectively.

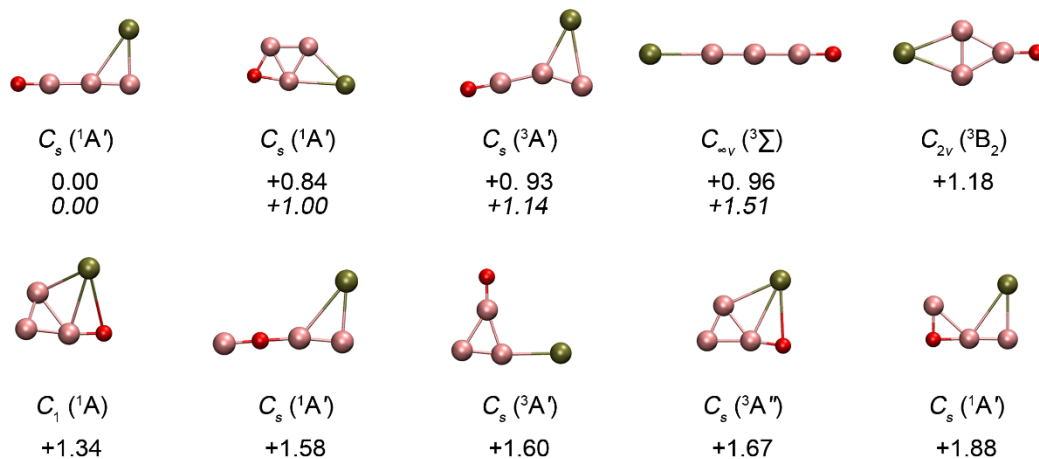

**Fig. S2.** Low-lying isomers of  $PbB_3O^-$ , along with their relative energies indicated in eV at PBE0/AVTZ and CCSD(T)/AVTZ (in italic) levels, respectively.

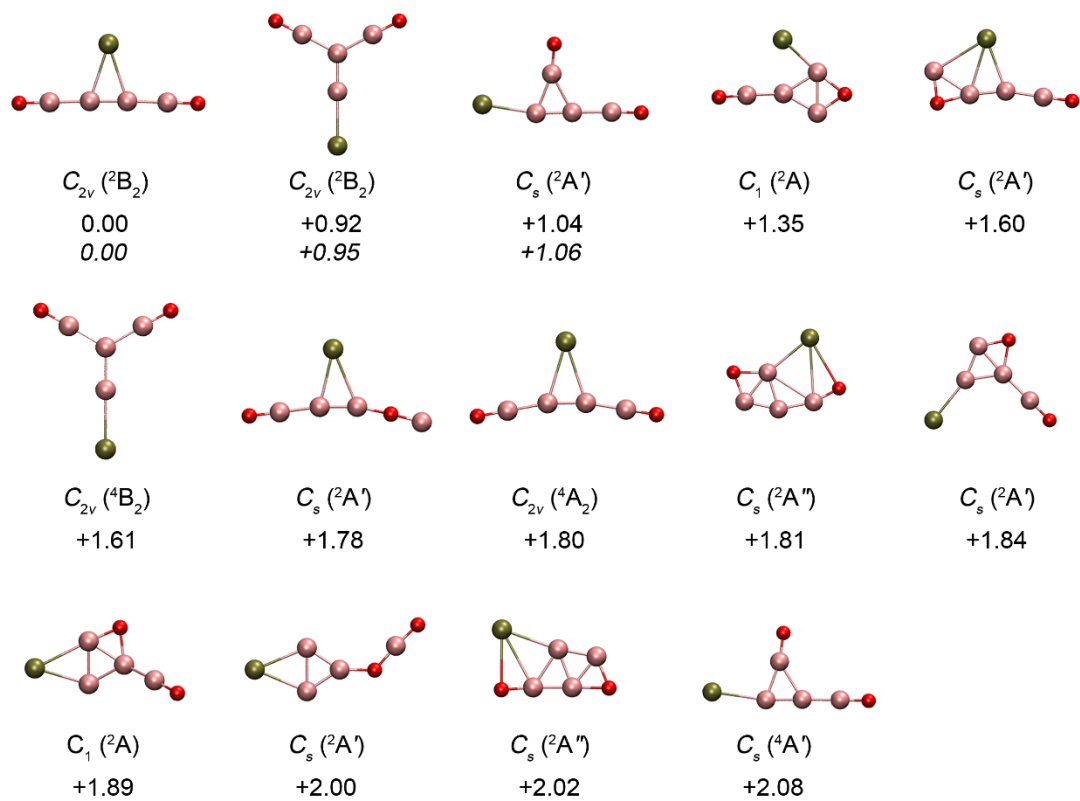

**Fig. S3.** Low-lying isomers of  $PbB_4O_2^-$ , along with their relative energies indicated in eV at PBE0/AVTZ and CCSD(T)/AVTZ (in italic) levels, respectively.

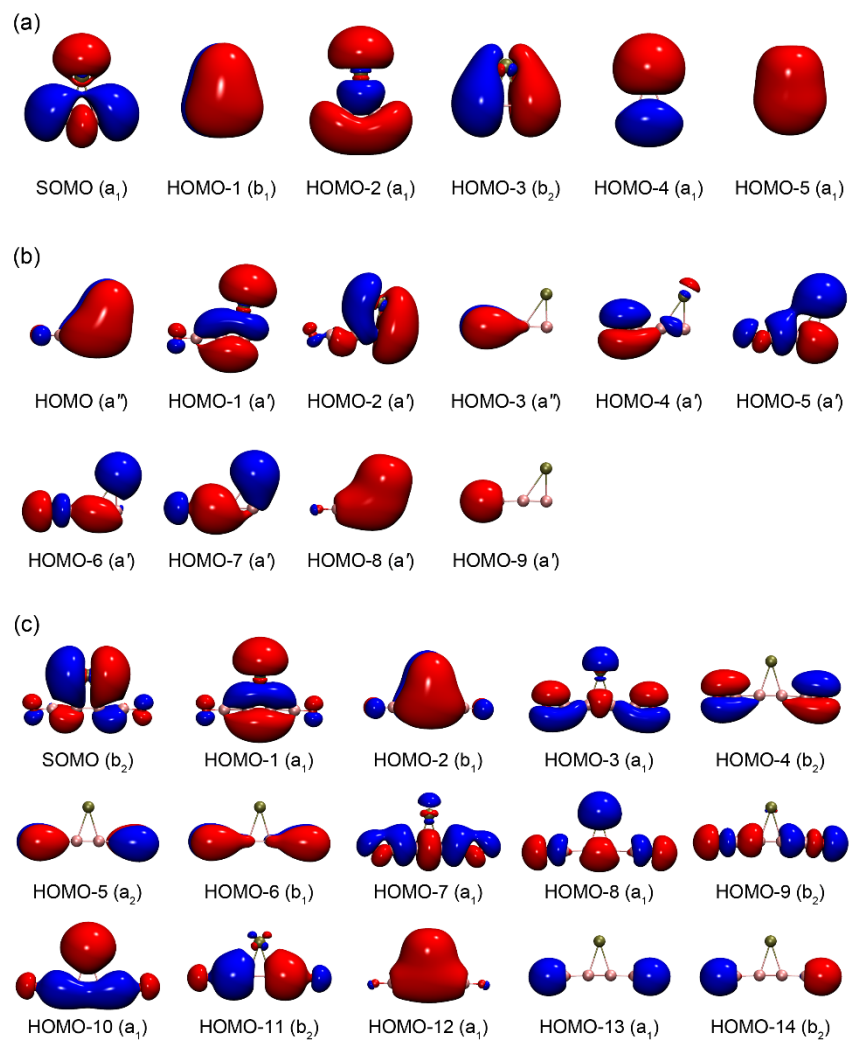

**Fig. S4.** Occupied valence molecular orbitals for the global minima of (a)  $C_{2v}$   $PbB_2^-$  (**1**), (b)  $C_s$   $PbB_3O^-$  (**2**), and (c)  $C_{2v}$   $PbB_4O_2^-$  (**3**).

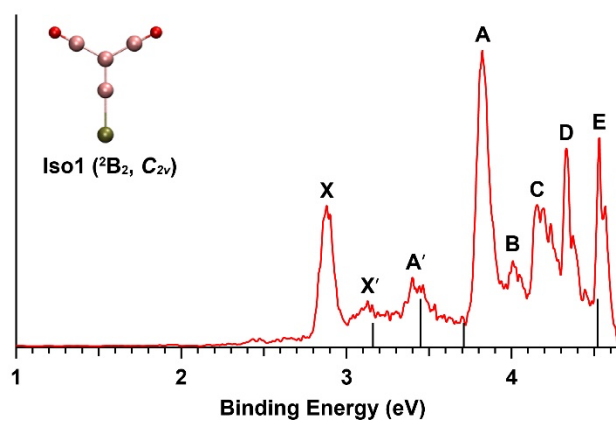

**Fig. S5.** Comparison between the photoelectron spectrum with the computed VDEs of  $\text{PbB}_4\text{O}_2^-$  at 266 nm. The vertical bars correspond to computed VDEs using the CCSD(T) method. The longer and shorter bars correspond to transitions to triplet and singlet final states, respectively.

(a)  $C_{2v}$   $PbB_2^-$  (**1**)

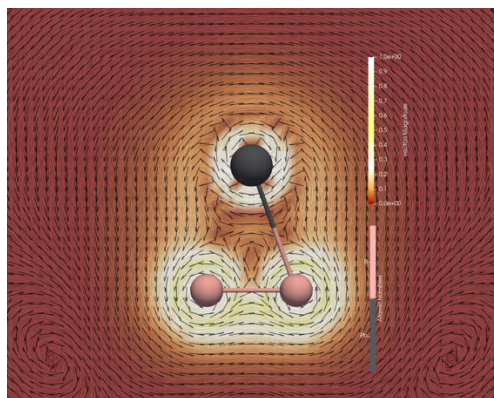

(c)  $C_{2v}$   $PbB_4O_2^-$  (**3**)

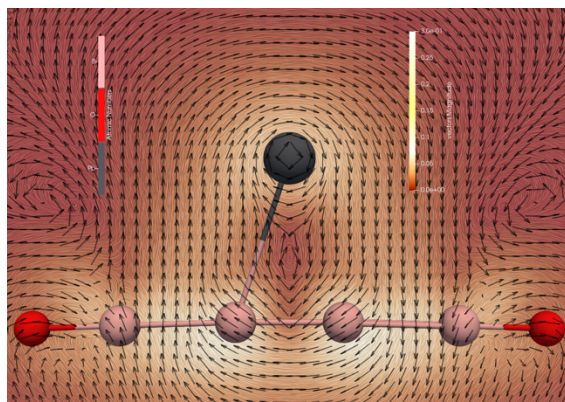

(b)  $C_s$   $PbB_3O^-$  (**2**)

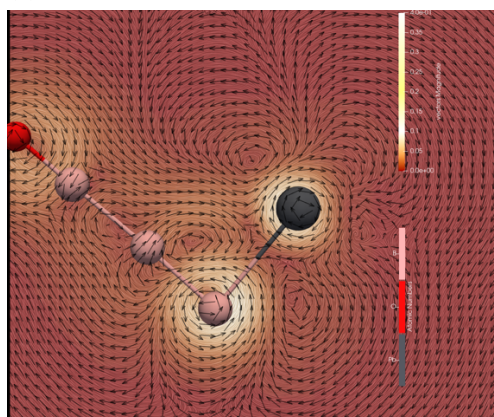

(d)  $C_{2v}$   $PbB_4O_2$  (**3'**)

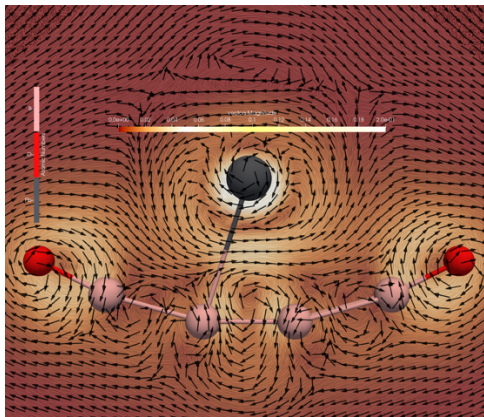

**Fig. S6.** The strength and direction of the induced current for (a)  $C_{2v}$   $PbB_2^-$  (**1**) at the molecular plane, and for (b)  $C_s$   $PbB_3O^-$  (**2**) at  $1.5 a_0$  above the molecular plane, and for (c)  $C_{2v}$   $PbB_4O_2^-$  (**3**) at  $1.5 a_0$  above the molecular plane, and for (d)  $C_{2v}$   $PbB_4O_2$  (**3'**) at  $1.5 a_0$  above the molecular plane calculated by the GIMIC program. The magnetic field is pointing out of the molecule plane.

**Table S1.** The experimental vertical detachment energies (VDEs) for  $\text{PbB}_4\text{O}_2^-$  in comparison with theoretical VDEs for Y-shaped  $\text{PbB}_4\text{O}_2^-$  at PBE0/AVTZ and CCSD(T)/AVTZ levels. All energies are given in eV.

| Feature | VDE <sup>a</sup><br>(exp) | Configurations                                                                                                                                                                                                | Terms                       | VDE (theo.)       |                      |
|---------|---------------------------|---------------------------------------------------------------------------------------------------------------------------------------------------------------------------------------------------------------|-----------------------------|-------------------|----------------------|
|         |                           |                                                                                                                                                                                                               |                             | PBE0 <sup>b</sup> | CCSD(T) <sup>c</sup> |
| X       | 2.88                      |                                                                                                                                                                                                               |                             |                   |                      |
| X'      | 3.13                      | ...1b <sub>1</sub> <sup>2</sup> 1a <sub>2</sub> <sup>2</sup> 4b <sub>2</sub> <sup>2</sup> 6a <sub>1</sub> <sup>2</sup> 7a <sub>1</sub> <sup>2</sup> 2b <sub>1</sub> <sup>2</sup> 5b <sub>2</sub> <sup>0</sup> | <sup>1</sup> A <sub>1</sub> | 3.29              | 3.16                 |
| A'      | 3.40                      | ...1b <sub>1</sub> <sup>2</sup> 1a <sub>2</sub> <sup>2</sup> 4b <sub>2</sub> <sup>2</sup> 6a <sub>1</sub> <sup>2</sup> 7a <sub>1</sub> <sup>2</sup> 2b <sub>1</sub> <sup>1</sup> 5b <sub>2</sub> <sup>1</sup> | <sup>3</sup> A <sub>2</sub> | 3.40              | 3.45                 |
| A       | 3.82                      | ...1b <sub>1</sub> <sup>2</sup> 1a <sub>2</sub> <sup>2</sup> 4b <sub>2</sub> <sup>2</sup> 6a <sub>1</sub> <sup>2</sup> 7a <sub>1</sub> <sup>2</sup> 2b <sub>1</sub> <sup>1</sup> 5b <sub>2</sub> <sup>1</sup> | <sup>1</sup> A <sub>2</sub> | 3.84              | 3.71                 |
| B       | 4.01                      |                                                                                                                                                                                                               |                             |                   |                      |
| C       | 4.15                      |                                                                                                                                                                                                               |                             |                   |                      |
| D       | 4.33                      |                                                                                                                                                                                                               |                             |                   |                      |
| E       | 4.53                      | ...1b <sub>1</sub> <sup>2</sup> 1a <sub>2</sub> <sup>2</sup> 4b <sub>2</sub> <sup>2</sup> 6a <sub>1</sub> <sup>2</sup> 7a <sub>1</sub> <sup>1</sup> 2b <sub>1</sub> <sup>2</sup> 5b <sub>2</sub> <sup>1</sup> | <sup>3</sup> B <sub>1</sub> | 4.47              | 4.52                 |

<sup>a</sup> The experimental uncertainty was estimated to be  $\pm 0.02$  eV.

<sup>b</sup> The VDEs calculated using the TD-PBE0/AVTZ method.

<sup>c</sup> The first two VDEs were calculated using the CCSD(T)/AVTZ method, while the higher VDEs were calculated using the TD-PBE0/AVTZ method.



**Table S2.** Coordinates for optimized  $C_{2v}$   $PbB_2^-$  (**1**),  $C_s$   $PbB_3O^-$  (**2**), and  $C_{2v}$   $PbB_4O_2^{-/0}$  (**3** and **3'**), and  $C_{2v}$   $PbB_4O_2^{-/2-}$  (**4** and **4'**) at PBE0/AVTZ level.

$C_{2v}$   $PbB_2^-$  (**1**)

|    |             |             |            |
|----|-------------|-------------|------------|
| Pb | 0.23453000  | 0.00000000  | 0.00000000 |
| B  | -1.92314600 | 0.77147600  | 0.00000000 |
| B  | -1.92314600 | -0.77147600 | 0.00000000 |
|    | -1.34797311 | 0.00000000  | 0.00000000 |

(Centre of current at the molecular plane, Fig. S6a)

$C_s$   $PbB_3O^-$  (**2**)

|    |             |             |            |
|----|-------------|-------------|------------|
| Pb | 0.00000000  | 0.71644400  | 0.00000000 |
| B  | 0.64172300  | -1.77066000 | 0.00000000 |
| B  | -0.39546500 | -3.01579200 | 0.00000000 |
| B  | 1.65481400  | -0.65065700 | 0.00000000 |
| O  | -1.18817000 | -3.94535300 | 0.00000000 |
|    | 0.57158000  | -1.04077600 | 0.00000000 |

(Centre of current at 1.5  $a_0$  above the molecular plane, Fig. S6b)

$C_{2v}$   $PbB_4O_2^-$  (**3**)

|    |             |             |            |
|----|-------------|-------------|------------|
| Pb | 0.71202200  | 0.00000000  | 0.00000000 |
| B  | -1.61705200 | 2.36064400  | 0.00000000 |
| B  | -1.57021300 | -0.74970700 | 0.00000000 |
| B  | -1.61705200 | -2.36064400 | 0.00000000 |
| B  | -1.57021300 | 0.74970700  | 0.00000000 |
| O  | -1.65707100 | -3.58175500 | 0.00000000 |
| O  | -1.65707100 | 3.58175500  | 0.00000000 |
|    | -0.89314529 | 0.00000000  | 0.00000000 |

(Centre of current at 1.5  $a_0$  above the molecular plane, Fig. S6c)

$C_{2v}$   $PbB_4O_2$  (**3'**)

|    |             |             |            |
|----|-------------|-------------|------------|
| Pb | 0.53610400  | 0.00000000  | 0.00000000 |
| B  | -1.34307400 | 2.29677300  | 0.00000000 |
| B  | -1.77506000 | -0.73903100 | 0.00000000 |
| B  | -1.34307400 | -2.29677300 | 0.00000000 |
| B  | -1.77506000 | 0.73903100  | 0.00000000 |
| O  | -0.79870000 | -3.37985600 | 0.00000000 |
| O  | -0.79870000 | 3.37985600  | 0.00000000 |
|    | -1.44100246 | 0.00000000  | 0.00000000 |

(Centre of current at 1.5  $a_0$  above the molecular plane, Fig. S6d)

$C_{2v}$   $PbB_4O_2^-$  (4)

|    |            |             |             |
|----|------------|-------------|-------------|
| Pb | 0.00000000 | 0.00000000  | 1.33048900  |
| B  | 0.00000000 | 0.00000000  | -0.88573600 |
| B  | 0.00000000 | 1.44352800  | -3.21600000 |
| B  | 0.00000000 | 0.00000000  | -2.44570400 |
| B  | 0.00000000 | -1.44352800 | -3.21600000 |
| O  | 0.00000000 | 2.53020100  | -3.76767900 |
| O  | 0.00000000 | -2.53020100 | -3.76767900 |

$C_{2v}$   $PbB_4O_2^{2-}$  (4)

|    |            |             |             |
|----|------------|-------------|-------------|
| Pb | 0.00000000 | 0.00000000  | 1.35287200  |
| B  | 0.00000000 | 0.00000000  | -0.85549600 |
| B  | 0.00000000 | 1.41641300  | -3.24880500 |
| B  | 0.00000000 | 0.00000000  | -2.43344700 |
| B  | 0.00000000 | -1.41641300 | -3.24880500 |
| O  | 0.00000000 | 2.47448000  | -3.87517100 |
| O  | 0.00000000 | -2.47448000 | -3.87517100 |

**Table S3.** Natural resonance theory (NRT) bond orders for the Pb–B and B–B bonds in  $C_{2v}PbB_2^-$  (**1**),  $C_s PbB_3O^-$  (**2**),  $C_{2v} PbB_4O_2^{-/0}$  (**3** and **3'**), and  $C_{2v} PbB_4O_2^{-/2-}$  (**4** and **4'**) at PBE0/AVTZ level.

|      | $C_{2v} PbB_2^-$<br>( <b>1</b> ) | $C_s PbB_3O^-$<br>( <b>2</b> ) | $C_{2v} PbB_4O_2^-$<br>( <b>3</b> ) | $C_{2v} PbB_4O_2$<br>( <b>3'</b> ) | $C_{2v} PbB_4O_2^-$<br>( <b>4</b> ) | $C_{2v} PbB_4O_2^{2-}$<br>( <b>4'</b> ) |
|------|----------------------------------|--------------------------------|-------------------------------------|------------------------------------|-------------------------------------|-----------------------------------------|
| Pb–B | 1.04                             | 1.55/0.63                      | 0.78                                | 0.63                               | 1.72                                | 2.08                                    |
| B–B  | 1.68                             | 1.78                           | 1.76                                | 1.84                               | 1.59                                | 1.69                                    |
